# Supplementary material for: Photocatalytic hydrogen generation from water using a hybrid of graphene nanoplatelets and self doped TiO2–Pd
Source: Royal Society of Chemistry journal article supplement (doi:10.1039/c3ra47974a), 2014-01-01
Supplement: c3ra47974a1.pdf [file c3ra47974a1.pdf]

### Electronic Supplementary Information

Figure S1. TEM and SAED pattern of  $\text{TiO}_2\text{R}$ ; S2. Table 1. Positions of D and G band, FWHM of D and G band, intensity ratio of D and G band ( $I_D/I_G$ ) as obtained from Raman spectra  
Figure S3. XPS of  $\text{TiO}_2$ ,  $\text{TiO}_2\text{R}$  and  $\text{TiO}_2\text{R-3G}$ ; Figure S4. N1s XPS of  $\text{TiO}_2\text{R}$  and  $\text{TiO}_2\text{R-3G}$ ;  
Figure S5 Photocatalytic activity of Pd- $\text{TiO}_2\text{R-3G}$  for 1<sup>st</sup> and 2<sup>nd</sup> cycles; S6. Details of photocatalytic reactor and irradiation chamber; Figure S7. Emission profile of the fluorescent lamp used for photocatalysis;

### Photocatalytic Hydrogen Generation from Water using a Hybrid of Graphene Nanoplatelets and Self Doped $\text{TiO}_2\text{-Pd}$

Farheen N. Sayed, R. Sasikala\*, O.D. Jayakumar\*, R. Rao, C.A. Betty, Anand Chokkalingam, R. M. Kadam, Jagannath, S. R. Bharadwaj, Ajayan Vinu and A.K. Tyagi

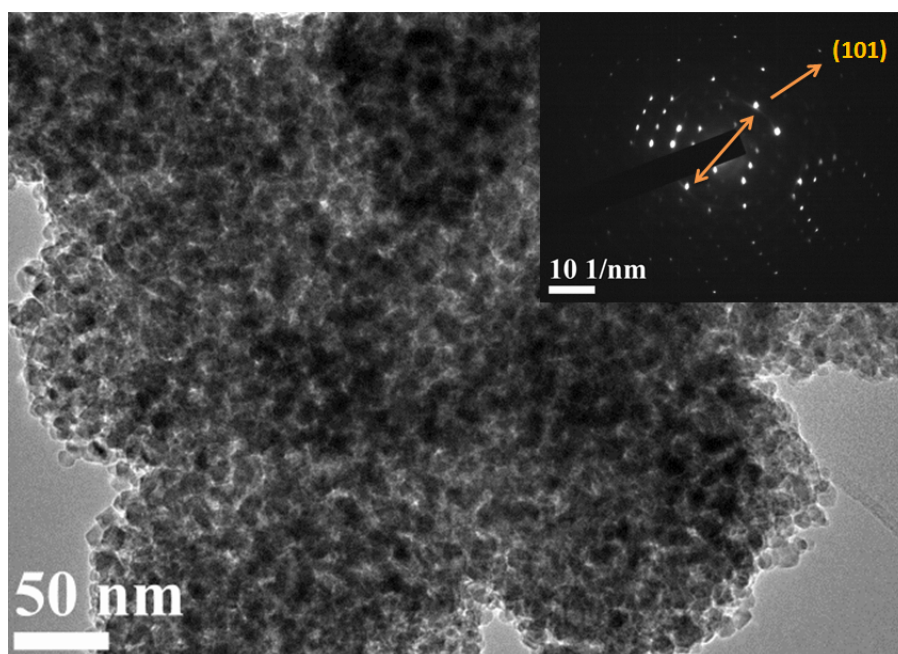

**Figure S1. TEM and SAED pattern of  $\text{TiO}_2\text{R}$ .**

S2. Table 1. Positions of D and G band, FWHM of D and G band, intensity ratio of D and G band ( $I_D/I_G$ ) as obtained from Raman spectra

|                                        | G    | TiO <sub>2</sub> R-1G | TiO <sub>2</sub> R-3G | TiO <sub>2</sub> R-5G |
|----------------------------------------|------|-----------------------|-----------------------|-----------------------|
| Position of D band (cm <sup>-1</sup> ) | 1364 | 1393                  | 1385                  | 1372                  |
| Position of G band (cm <sup>-1</sup> ) | 1583 | 1587                  | 1372                  | 1579                  |
| FWHM of D band (cm <sup>-1</sup> )     | 48   | 247                   | 203                   | 238                   |
| FWHM of G band (cm <sup>-1</sup> )     | 30   | 91                    | 84                    | 88                    |
| $I_D/I_G$                              | 0.3  | 2.5                   | 1.4                   | 1.7                   |

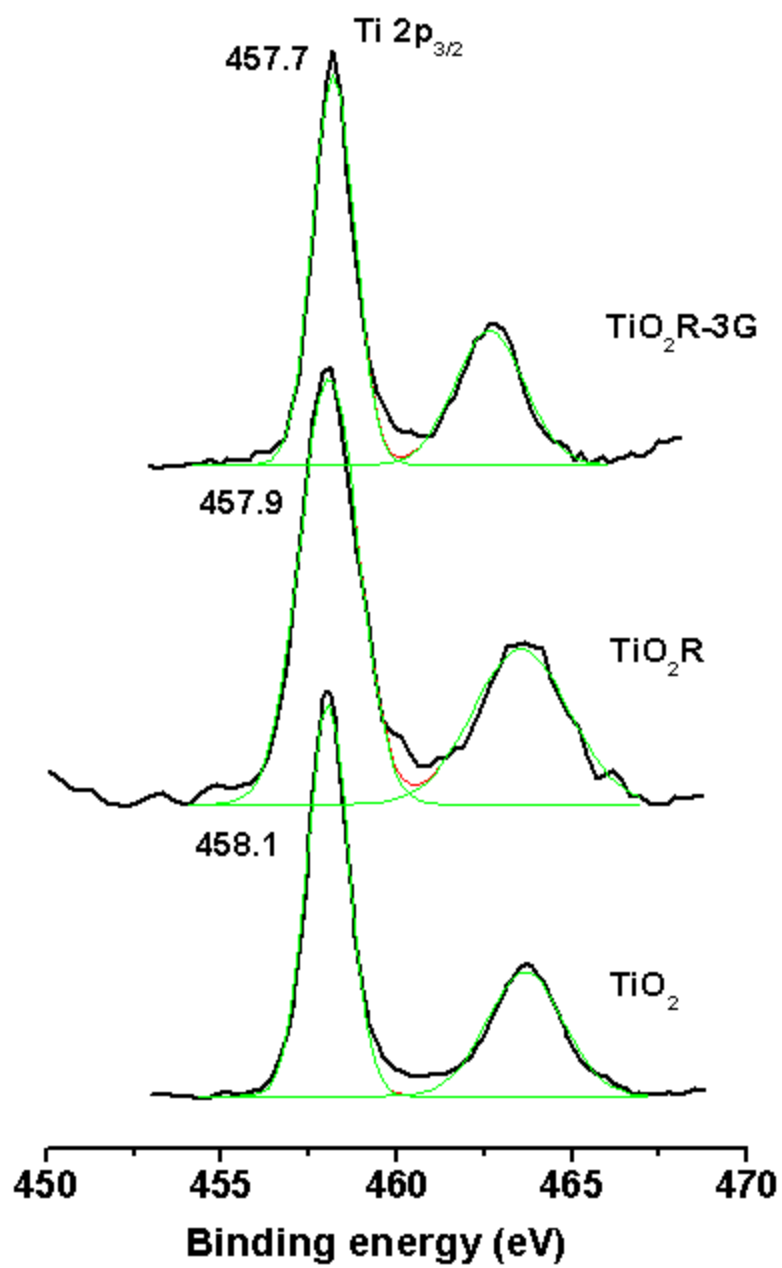

Figure S3 XPS of TiO<sub>2</sub>, TiO<sub>2</sub>R and TiO<sub>2</sub>R-3G

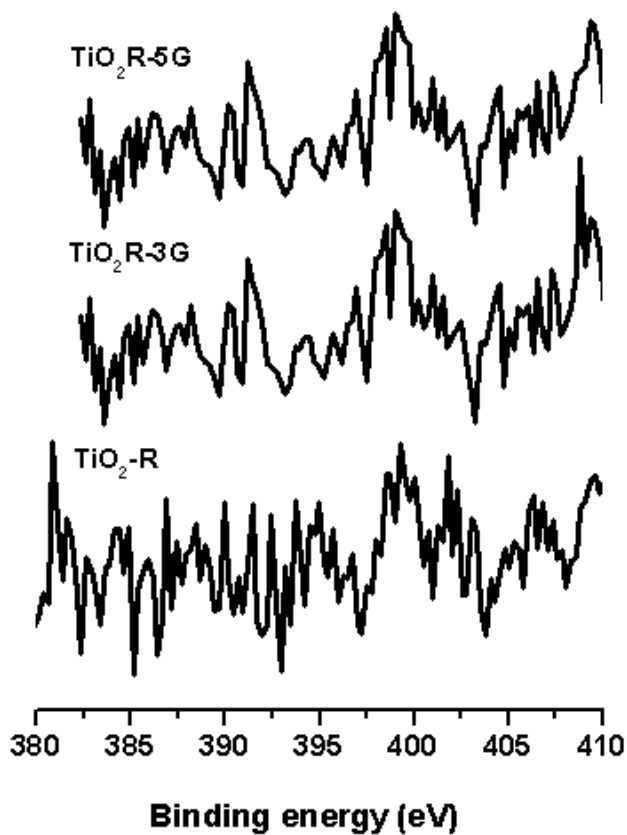

Figure S4. N1s XPS of TiO<sub>2</sub>R, TiO<sub>2</sub>R-3G and TiO<sub>2</sub>R-5G

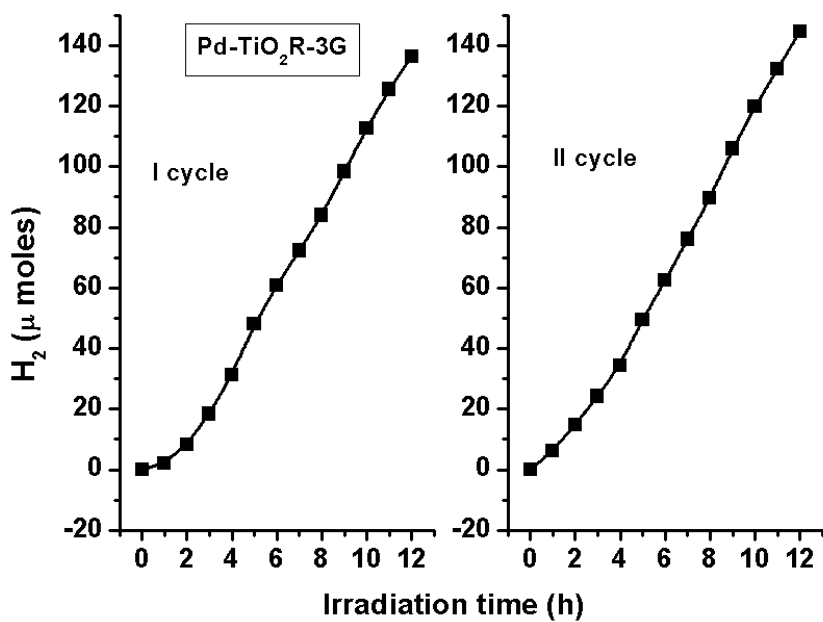

Figure S5. Photocatalytic activity of Pd-TiO<sub>2</sub>R-3G for 1<sup>st</sup> and 2<sup>nd</sup> cycles

## S6. Details of the photocatalytic reactor and irradiation chamber

Photocatalytic activity was studied in a tubular quartz reactor of length 13 cm and diameter 2 cm closed with a teflon stopcock. It was also provided with a side tube closed with silicone rubber septum through which gas mixture could be removed for analysis. Samples were irradiated in a circular chamber of internal diameter 44 cm and height 46 cm fixed with eight ordinary day light fluorescent lamps (Wipro, 36 watts each, emissive length of the tube ~37 cm and radius 1.5 cm) vertically and symmetrically on the walls. Spectrum of the lamp consisted of fluorescent emission predominantly in the visible region along with a UV contribution of ~3%. The reactor was placed at the centre of the circular irradiation chamber vertically.

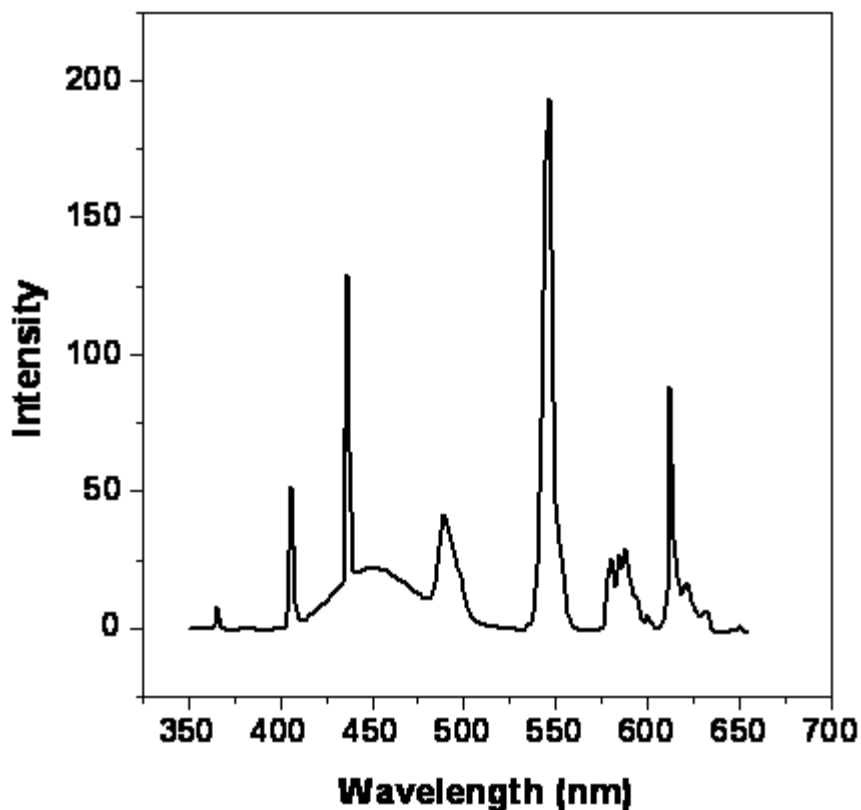

Figure S7. Emission profile of the fluorescent lamp used for photocatalysis
